# Supplementary material for: Production and Partial Characterization of Bioactive Compounds from Underutilized Marine Bioresources for a Cosmetic Formulation: Cytotoxicity and Bioactivity Evaluation
Source: MDPI journal article supplement (doi:10.3390/ijms242015380), 2023-10-19
Supplement: s1 [file s1]

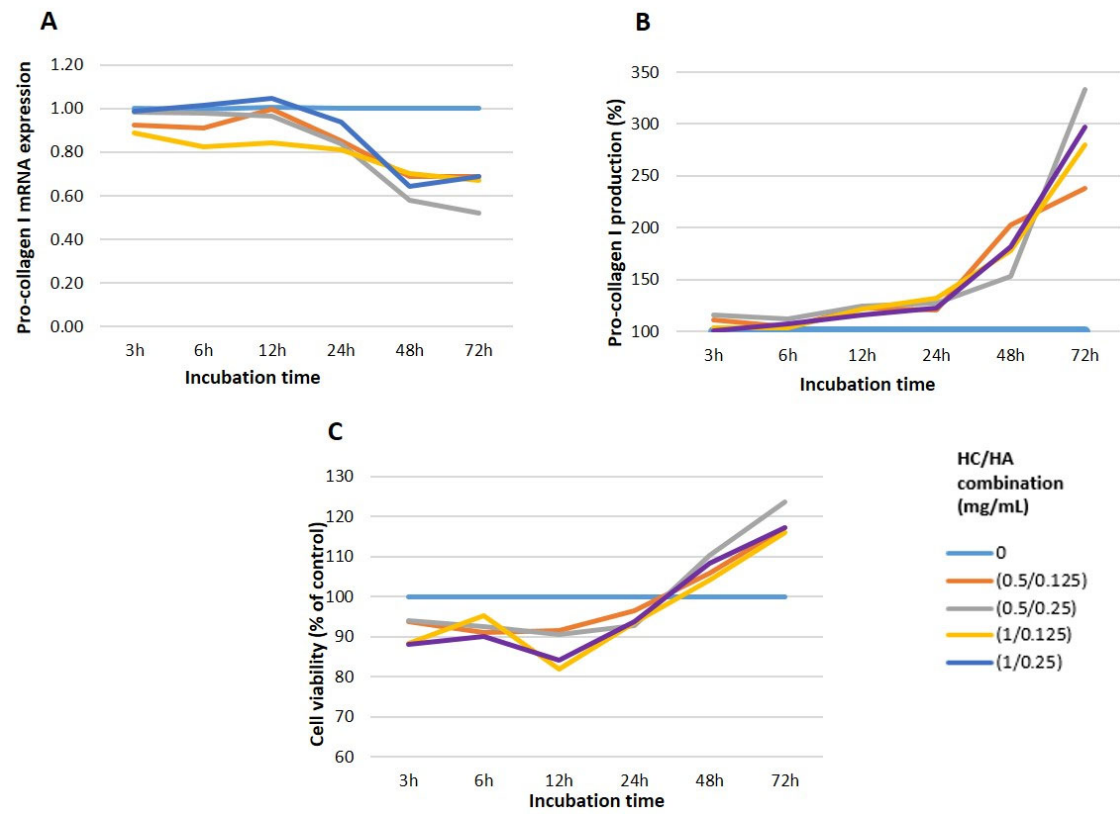

**Figure S1.** Procollagen I mRNA expression (A), Procollagen I syntesis (B) and cell viability (C) from 3 to 72 h of HC/HA treatment incubation.

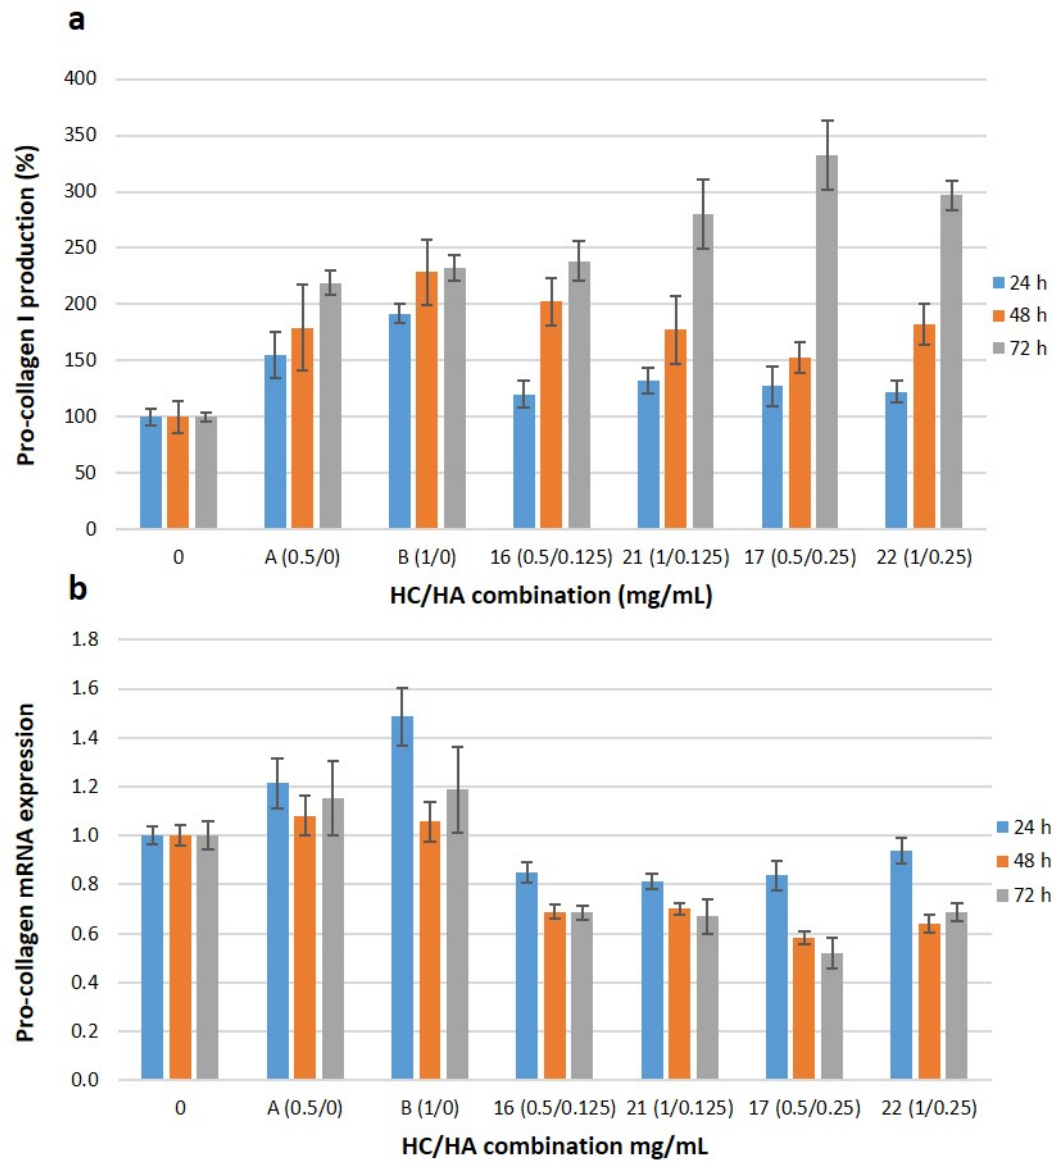

**Figure S2.** Pro-collagen I production (a) and Pro-collagen mRNA expression (b). A and B correspond to treatments used in Blanco et al.[11].
